# Supplementary material for: A convenient and versatile synthesis of Laurdan-like fluorescent membrane probes: characterization of their fluorescence properties
Source: Royal Society of Chemistry journal article supplement (doi:10.1039/c5ra20369d), 2016-01-01

## Supporting Information

### A convenient and versatile synthesis of Laurdan-like fluorescent membrane probes: characterization of their fluorescence properties.

M. Cheniour<sup>a,b</sup>, D. Gueyrard<sup>a,c</sup>, P. G. Goekjian<sup>a,c</sup>, T. Granjon<sup>a,b</sup> and O. Marcillat<sup>a,b,\*</sup>

*a) Université Claude Bernard Lyon 1, Institut de Chimie et Biochimie Moléculaires et Supramoléculaires, UMR 5246 – CNRS, Université de Lyon, 43 Bd du 11 Novembre 1918, F-69622 Villeurbanne, France.*

*b) ODMB, ICBMS UMR 5246, CNRS, bâtiment Raulin, 43 Bd du 11 Novembre 1918, F-69622 Villeurbanne, France.*

*b) Laboratoire Chimie Organique 2 Glycochimie, Bat. 308 – Curien (CPE Lyon), 43 Bd. du 11 Novembre 1918, 69622 Villeurbanne, France.*

#### Table of Contents :

Spectroscopic data :

|                                                                    |           |
|--------------------------------------------------------------------|-----------|
| <sup>1</sup> H, <sup>13</sup> C spectra of compound <b>3</b> ..... | <b>S2</b> |
| <sup>1</sup> H, <sup>13</sup> C spectra of compound <b>4</b> ..... | <b>S3</b> |
| <sup>1</sup> H, <sup>13</sup> C spectra of compound <b>5</b> ..... | <b>S4</b> |
| <sup>1</sup> H, <sup>13</sup> C spectra of compound <b>6</b> ..... | <b>S5</b> |
| <sup>1</sup> H, <sup>13</sup> C spectra of C-Laurdan .....         | <b>S6</b> |

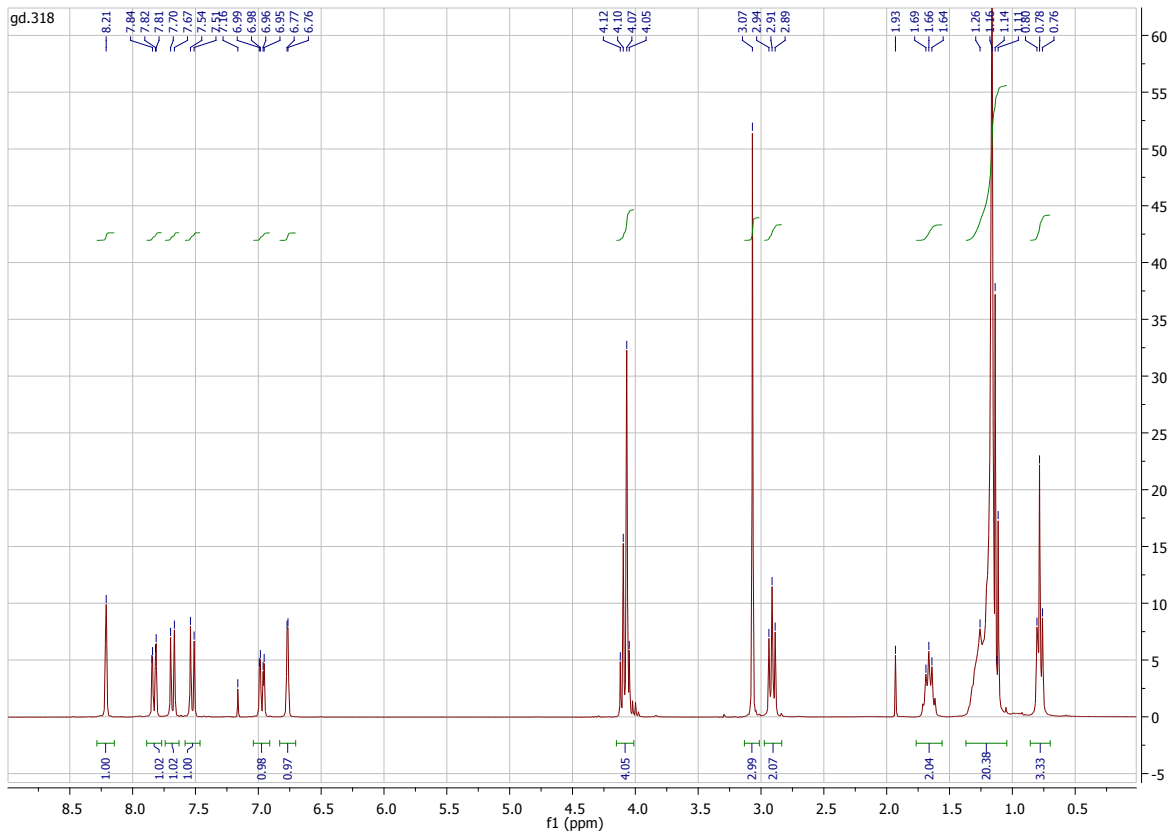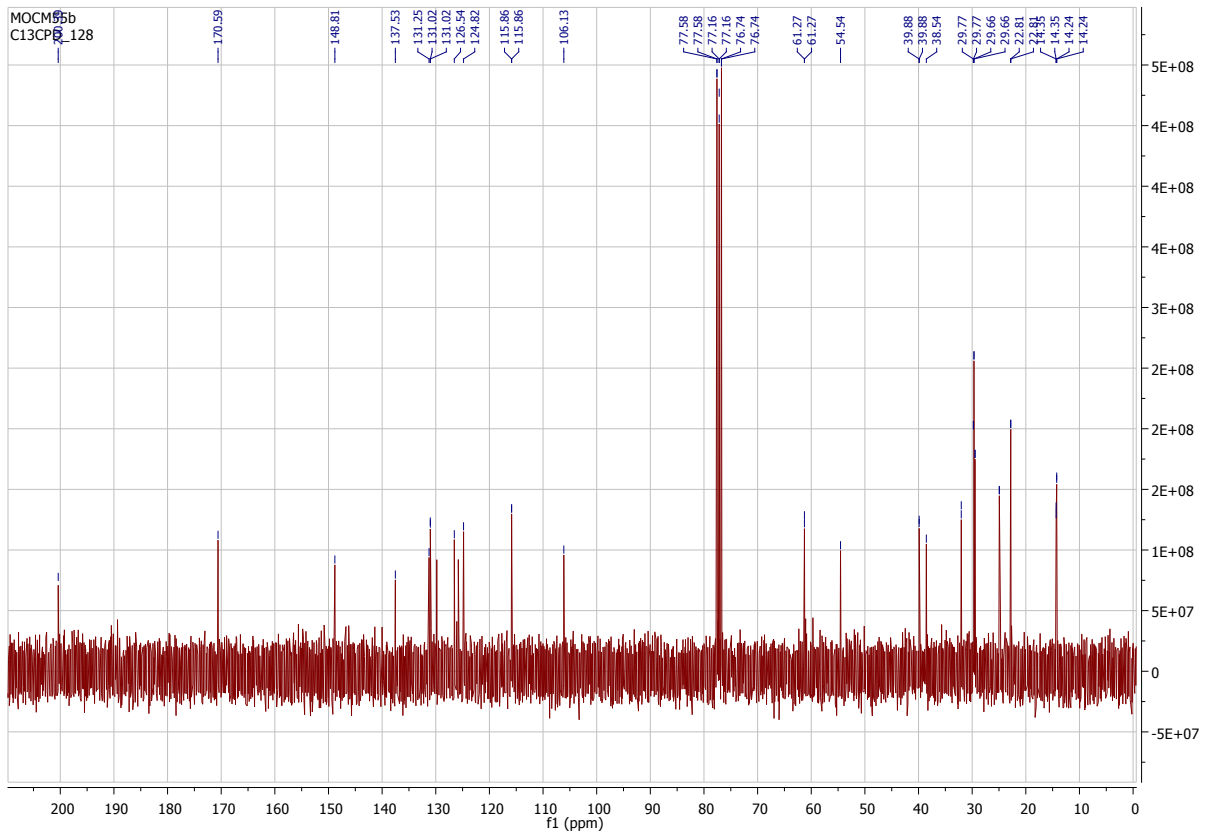

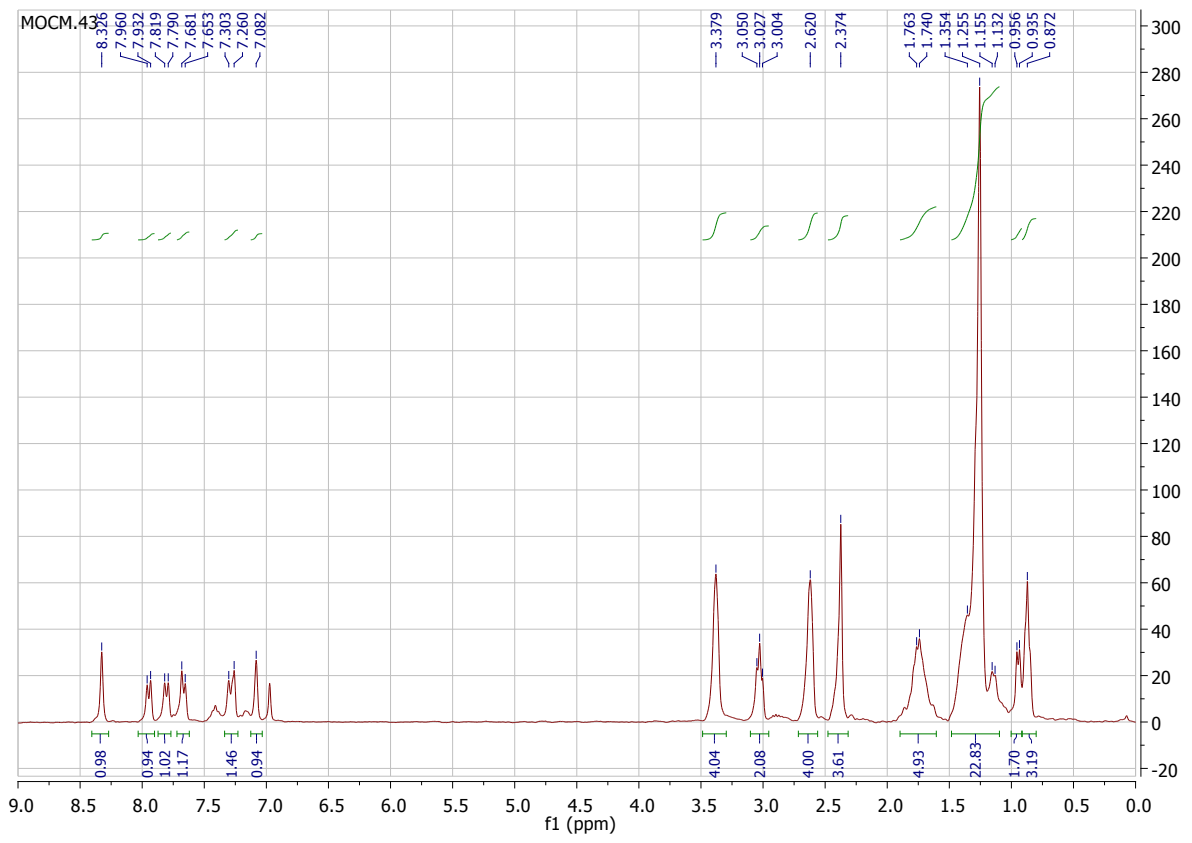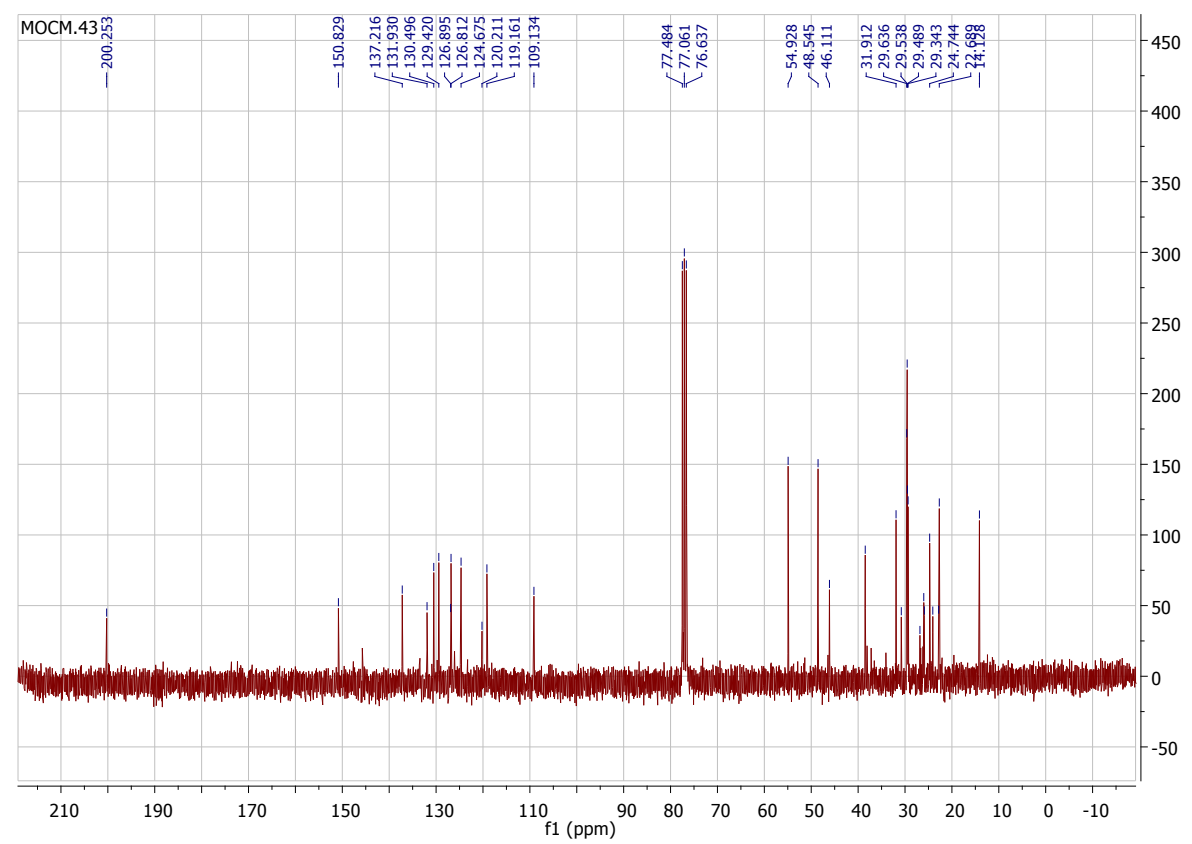

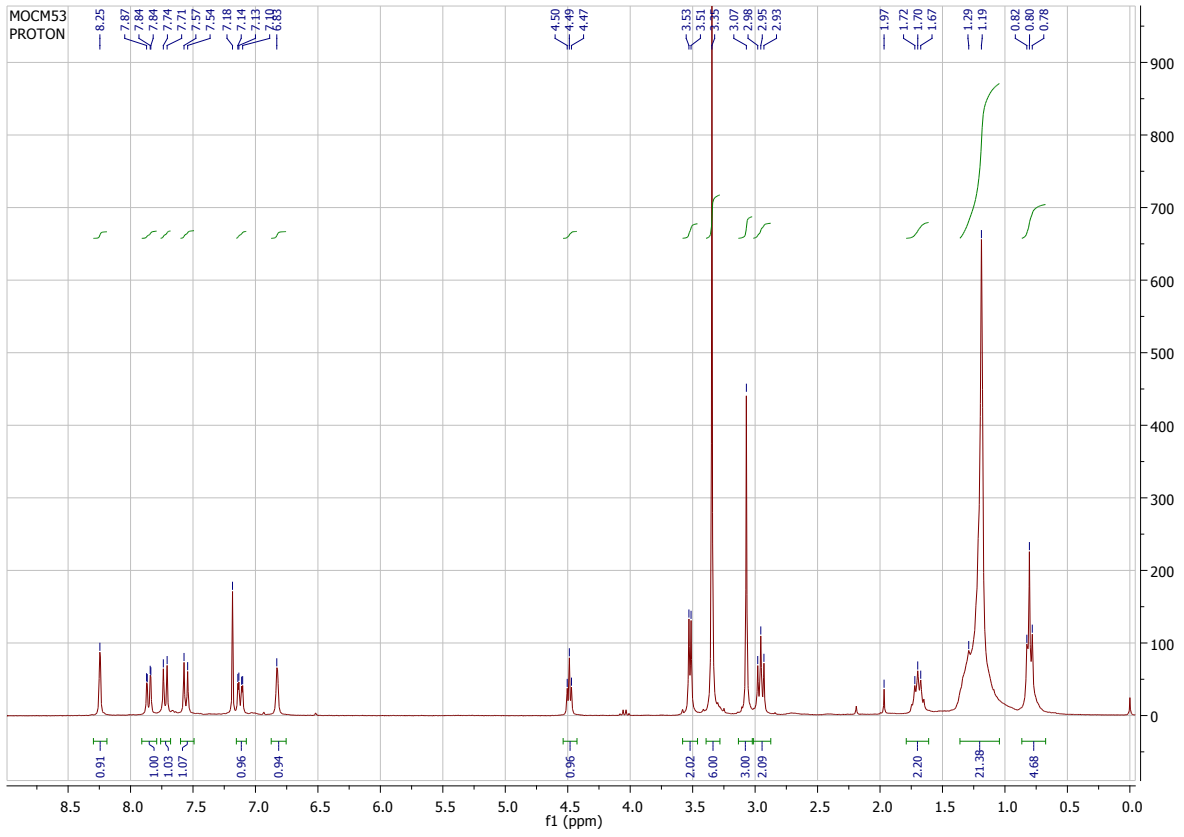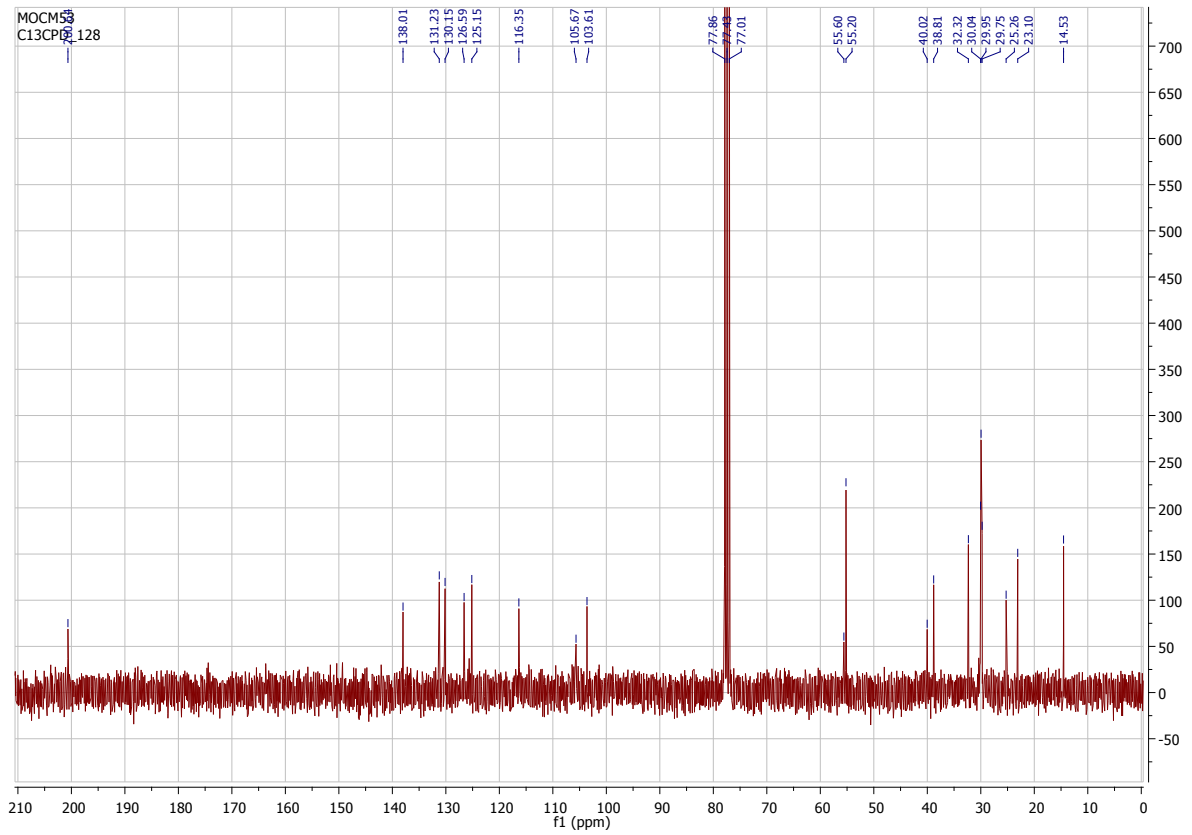

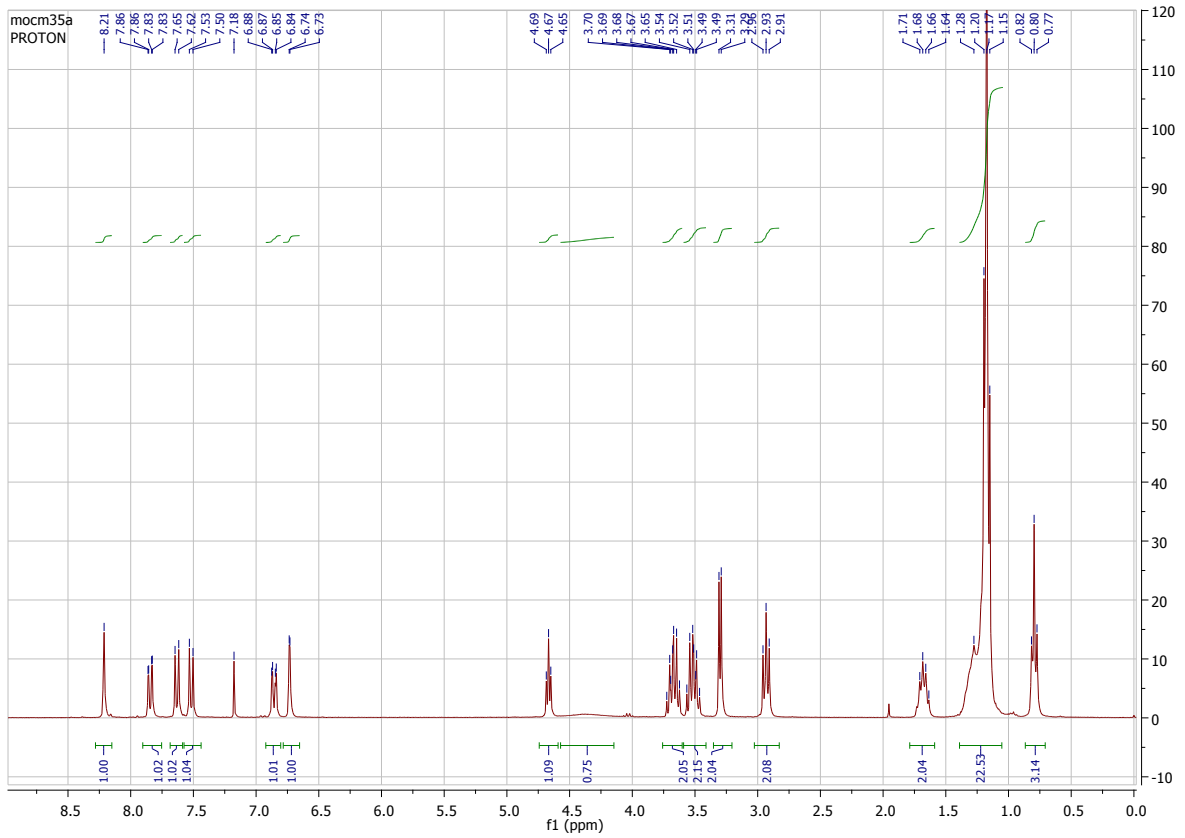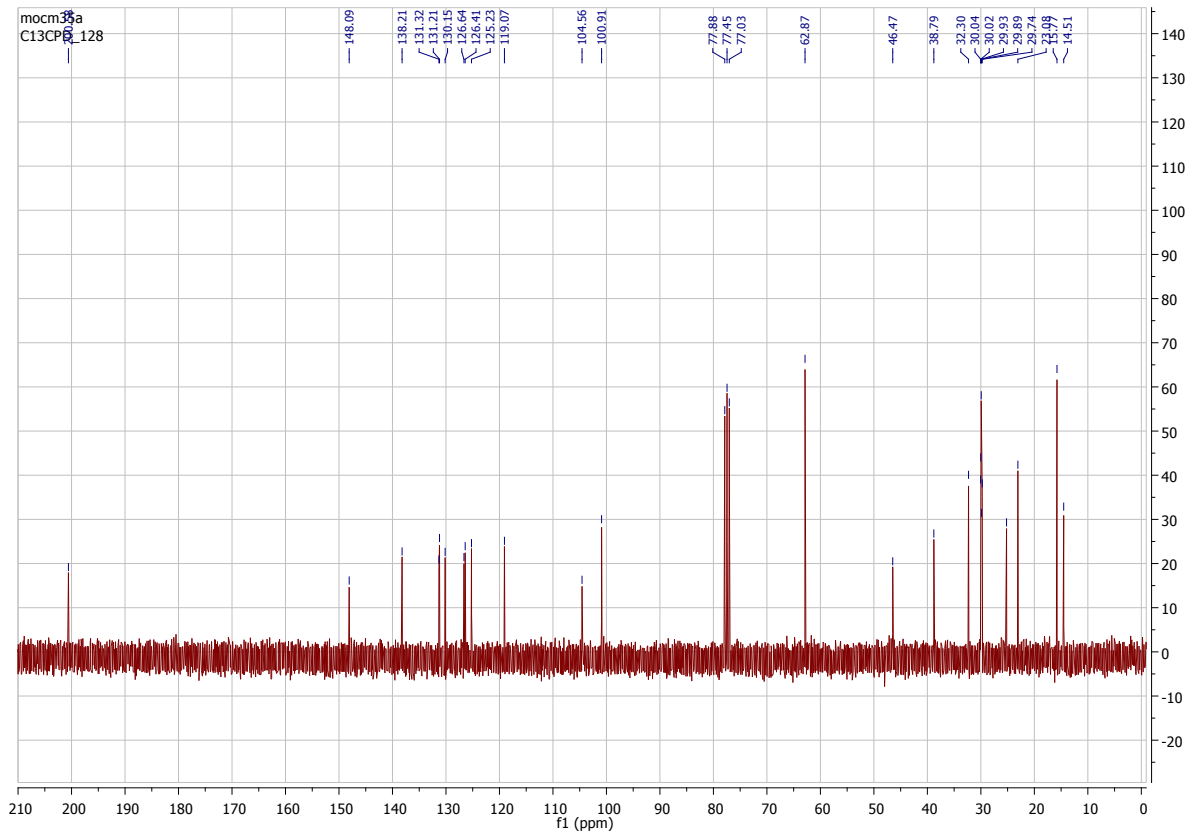

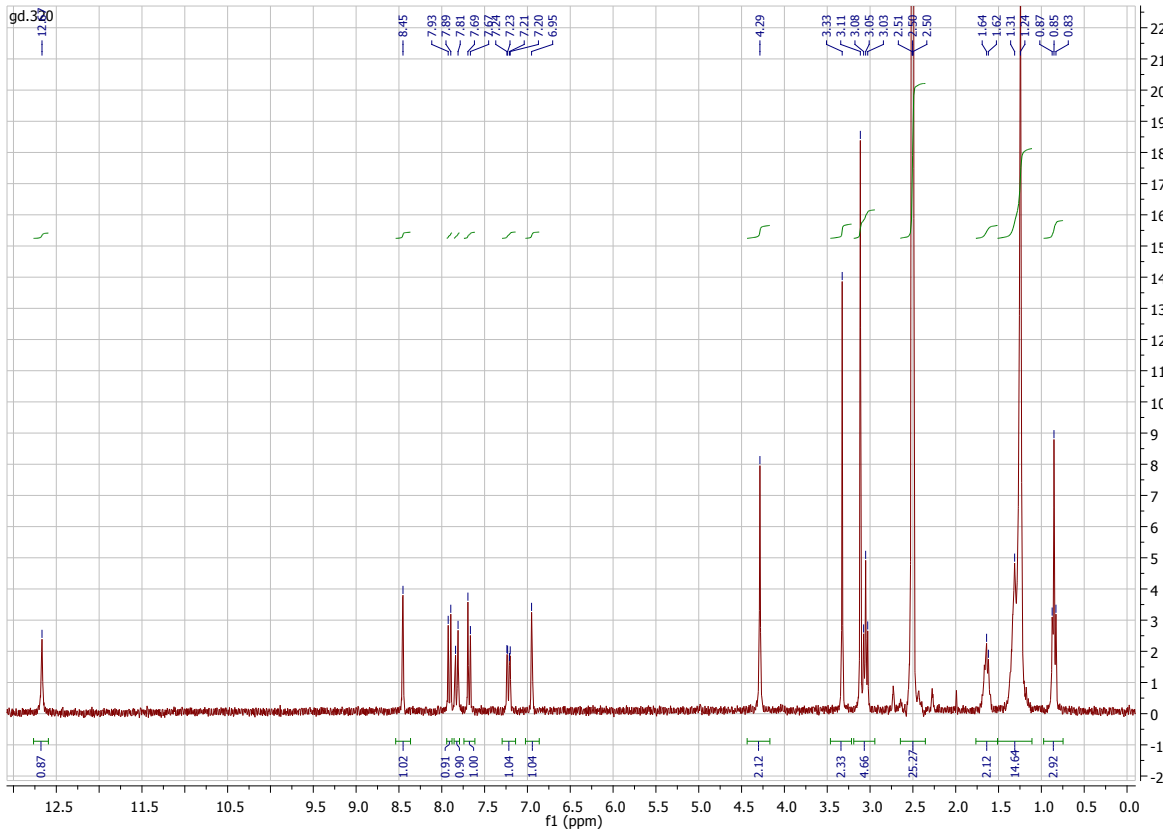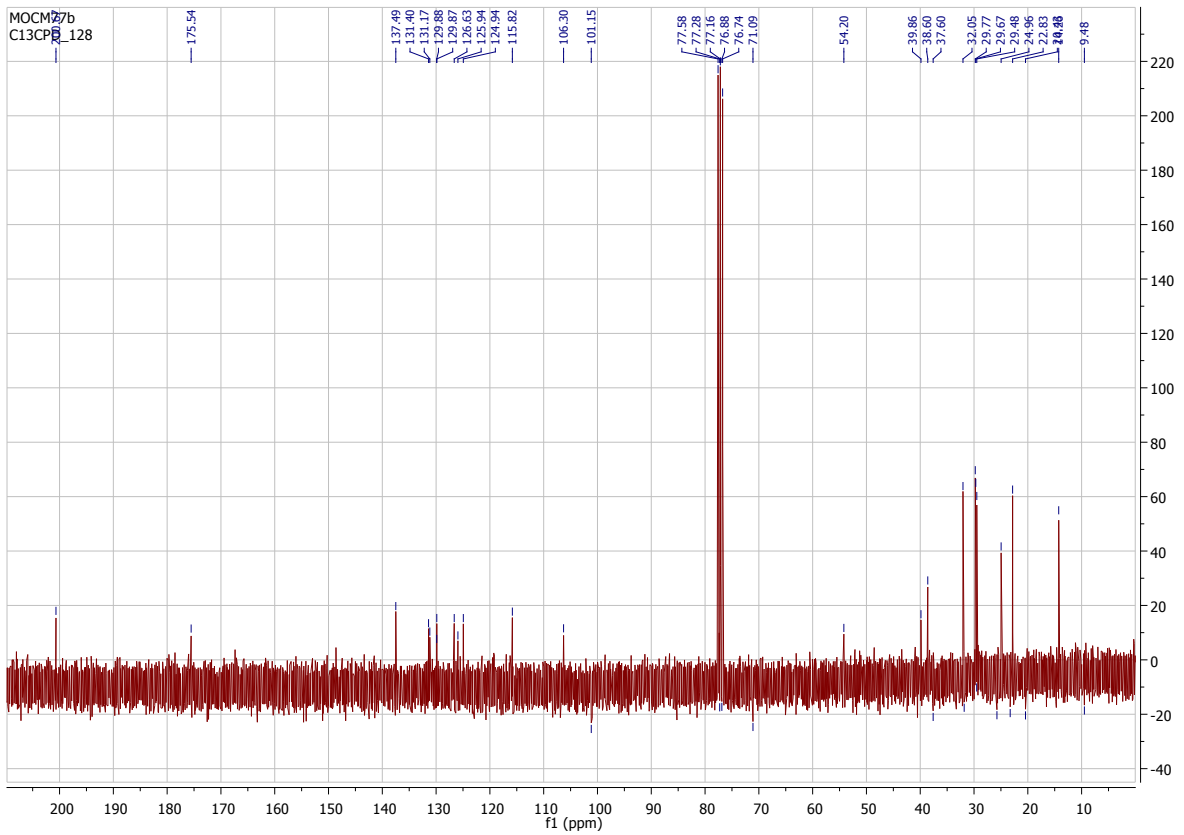

Supplement: c5ra20369d1.pdf [file c5ra20369d1.pdf]
